# Supplementary material
Source: PubMed Central journal article supplement (PMC4356477)
Supplement: Supp_Table1.pdf [file Supp_Table1.pdf]

## Supplementary Data

SUPPLEMENTARY TABLE S1. RESTRICTION ENDONUCLEASE CUTTING PATTERNS THAT REPRESENT EACH OF THE FIVE *HBB* GENE HAPLOTYPES

| <i>Enzymes</i><br><i>Haplotypes</i> | <i>XmnI</i> (5'Gγ) | <i>HindIII</i> (Gγ) | <i>HindIII</i> (Aγ) | <i>HincII</i> (3?'Ψβ) | <i>HinfI</i> (5'β) |
|-------------------------------------|--------------------|---------------------|---------------------|-----------------------|--------------------|
| Senegal                             | +                  | +                   | -                   | +                     | +                  |
| Bantu/Central African Republic      | -                  | +                   | -                   | -                     | -                  |
| Cameroon                            | -                  | +                   | +                   | +                     | +                  |
| Benin                               | -                  | -                   | -                   | +                     | -                  |
| Arab-Indian                         | +                  | +                   | -                   | +                     | -                  |

(+)=Cut by a specific restriction endonuclease; (-)=Is not cut by that specific restriction endonuclease.
